# Supplementary material
Source: Royal Society of Chemistry journal article supplement (doi:10.1039/d6ta02608g)
Supplement: d6ta02608g1.pdf [file d6ta02608g1.pdf]

## Supplementary material

### Dual-Stabilization Strategy Enabled High-Entropy Sulfide@Carbon Spheres for High-Performance Sodium Storage

Xinyu Liu<sup>a,b,1</sup>, Xingbo Yu<sup>a,b,1</sup>, Jianlong Wang<sup>a,b</sup>, binbin Zhang<sup>a,b</sup>, Baixin Han<sup>a,b</sup>, Guoli Zhang<sup>a,c,\*</sup>,

Kaixi Li<sup>a,b,\*</sup> and Taotao Guan<sup>a,b,\*</sup>

<sup>a</sup> Shanxi Key Laboratory of Carbon Materials, Institute of Coal Chemistry, Chinese Academy of Sciences, Taiyuan 030001, PR China;

<sup>b</sup> Center of Materials Science and Optoelectronics Engineering, University of Chinese Academy of Sciences, Beijing 100049, PR China;

<sup>c</sup> College of Materials Science and Engineering, Taiyuan University of Technology, Taiyuan 030024, PR China;

<sup>1</sup> Xinyu Liu and Xingbo Yu contributed equally to this work.

\* Corresponding authors.

E-mail addresses: zguoli@outlook.com (G. Zhang), likx@sxicc.ac.cn (K. Li), guantt@sxicc.ac.cn (T. Guan).

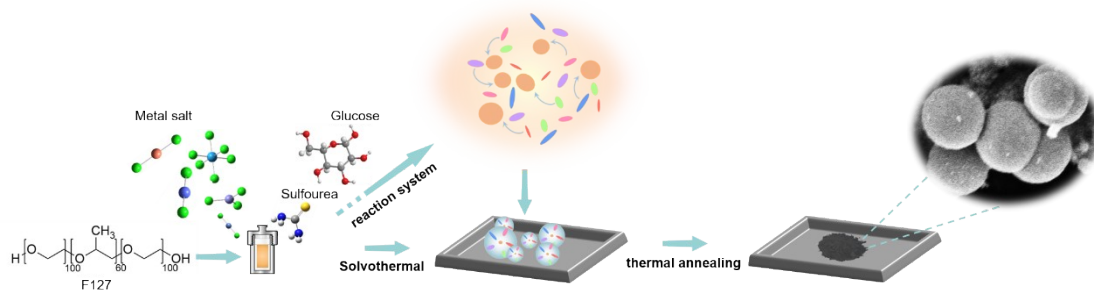

**Figure S1.** Schematic diagram of the preparation process for the (FeCoNiCuMo)<sub>2</sub>S<sub>2</sub>/C.

## Formation Mechanism of High-Entropy Sulfide/Carbon Composite (FeCoNiCuMo)<sub>2</sub>/C

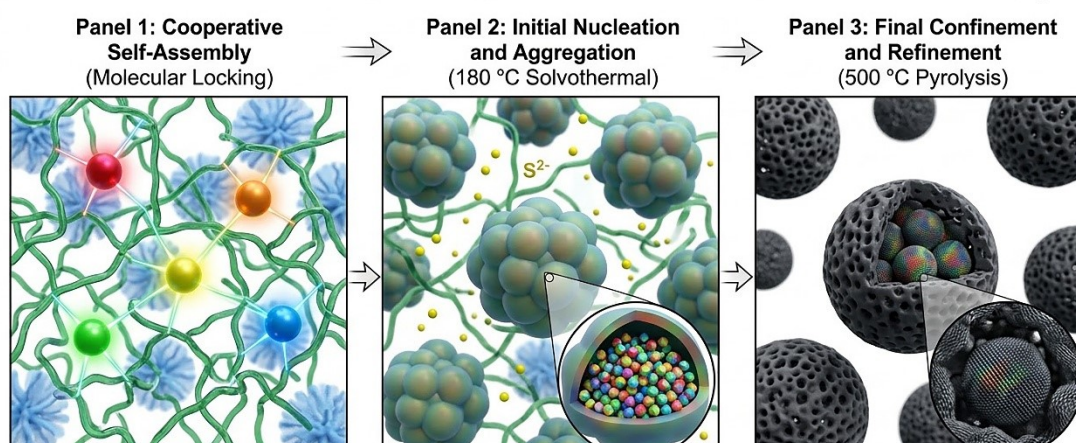

**Figure S2. Schematic illustration of the multi-stage formation mechanism for (FeCoNiCuMo)<sub>2</sub>/C high-entropy sulfide spheres. Panel 1: Cooperative Self-Assembly (Molecular Locking).** The process initiates with the formation of a stable organic–inorganic supramolecular network through hydrogen bonding between F127 surfactant micelles and glucose molecules. Simultaneously, the five transition metal cations (Fe<sup>2+</sup>, Co<sup>2+</sup>, Ni<sup>2+</sup>, Cu<sup>2+</sup>, and Mo<sup>5+</sup>) are coordinated and “locked” onto the multi-dentate ligands of the polymer chains. This dual-interaction mechanism ensures an atomic-scale homogeneous distribution of the multi-element precursors, effectively preventing premature elemental segregation at the molecular level. **Panel 2: Initial Nucleation and Crystallization (180 °C Solvothermal Stage).** During the solvothermal reaction, the slow decomposition of thiourea provides a controlled release of S<sup>2-</sup> ions. The high configurational entropy of the five-metal system (1.607R) suppresses the formation of individual binary sulfides, favoring **synchronous nucleation** of entropy-stabilized grains. As evidenced by Figure S12, the product at this stage consists of spherical micro-aggregates that already exhibit discernible diffraction peaks, confirming that the initial crystallization of the high-entropy sulfide core is successfully initiated during the solvothermal process. **Panel 3: Mesoscale Carbon Confinement and Structural Refinement (500 °C Pyrolysis).** Upon subsequent pyrolysis, the cross-linked polymer matrix is converted into a rigid and continuous carbon framework. This carbon scaffold provides intense spatial confinement that serves as a physical “cage”, effectively preventing the further aggregation or long-range diffusion of the pre-formed sulfide nuclei. This mechanism strictly limits the final nanoparticle size to approximately 1 nm while facilitating the final solid-state crystallization of the dual-phase high-entropy framework, ensuring long-term structural and interfacial stability

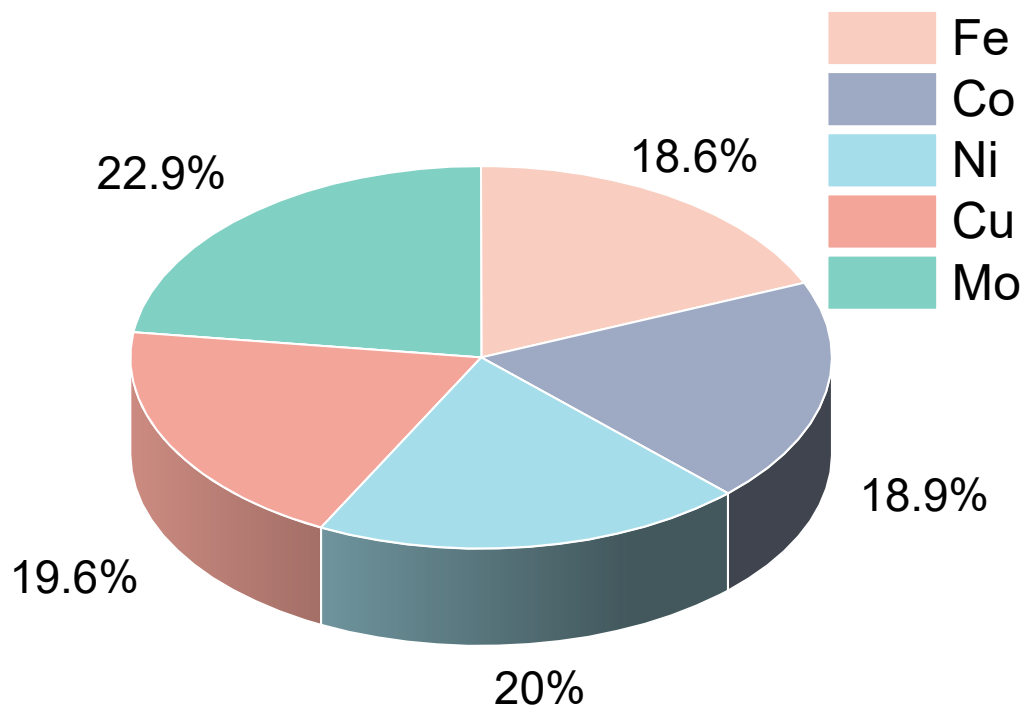

**Figure S3.** The ICP-OES of  $(\text{FeCoNiCuMo})\text{S}_2/\text{C}$

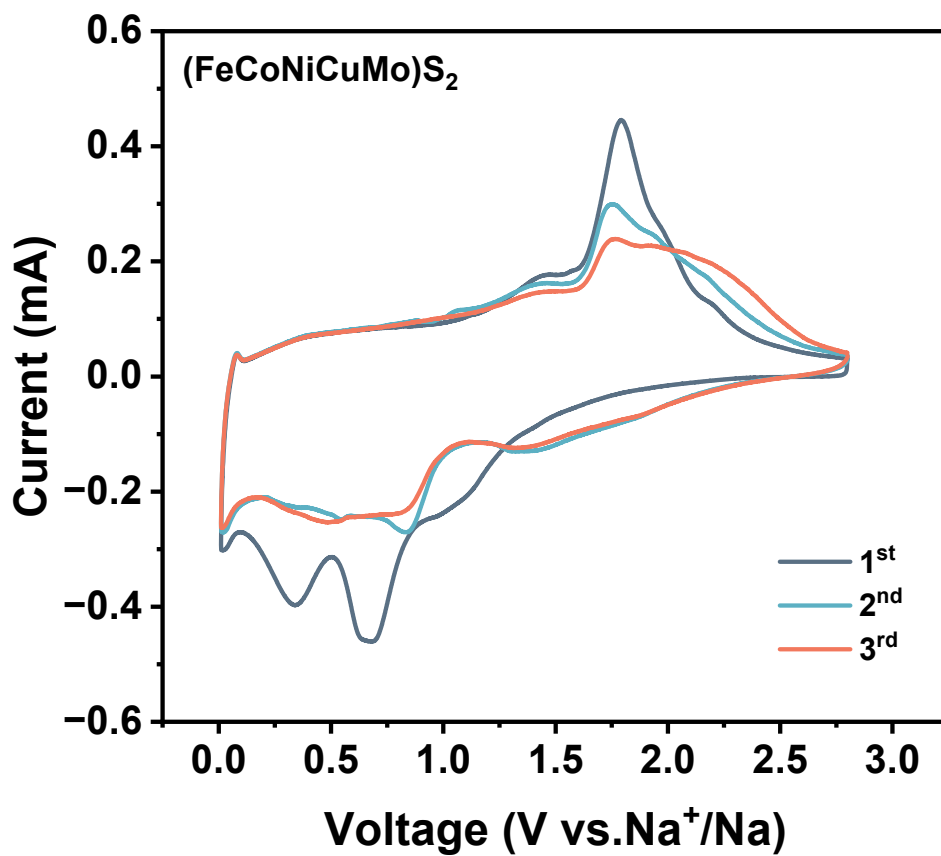

Figure S4. CV curves of  $(\text{FeCoNiCuMo})\text{S}_2$ .

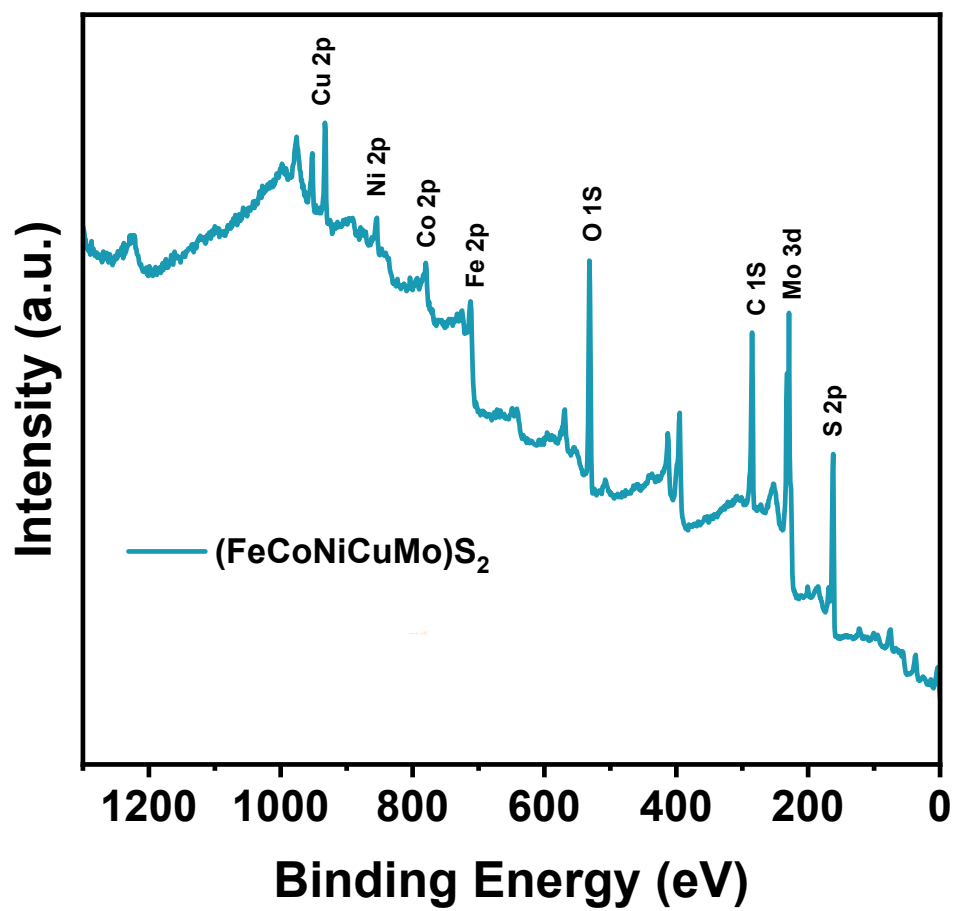

Figure S5. CV curves of  $(\text{FeCoNiCuMo})\text{S}_2/\text{C}$ .

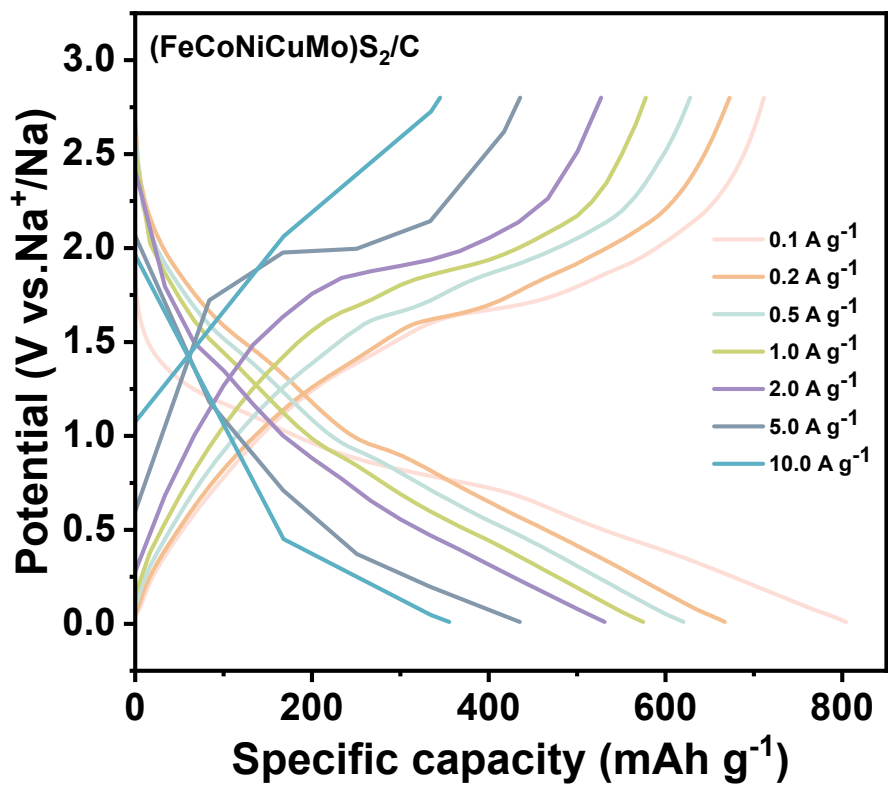

Figure S6. Rate capabilities of  $(\text{FeCoNiCuMo})\text{S}_2/\text{C}$ .

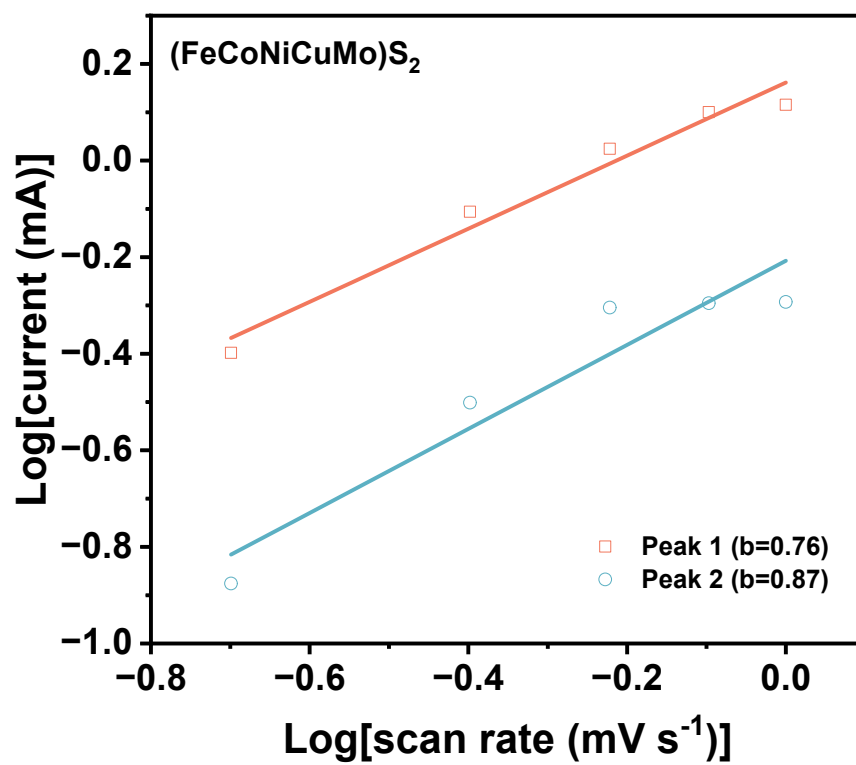

**Figure S7.** The linear correlation between the peak current (log *i*) and the sweep rate (log *v*) of

(FeCoNiCuMo)S<sub>2</sub>.

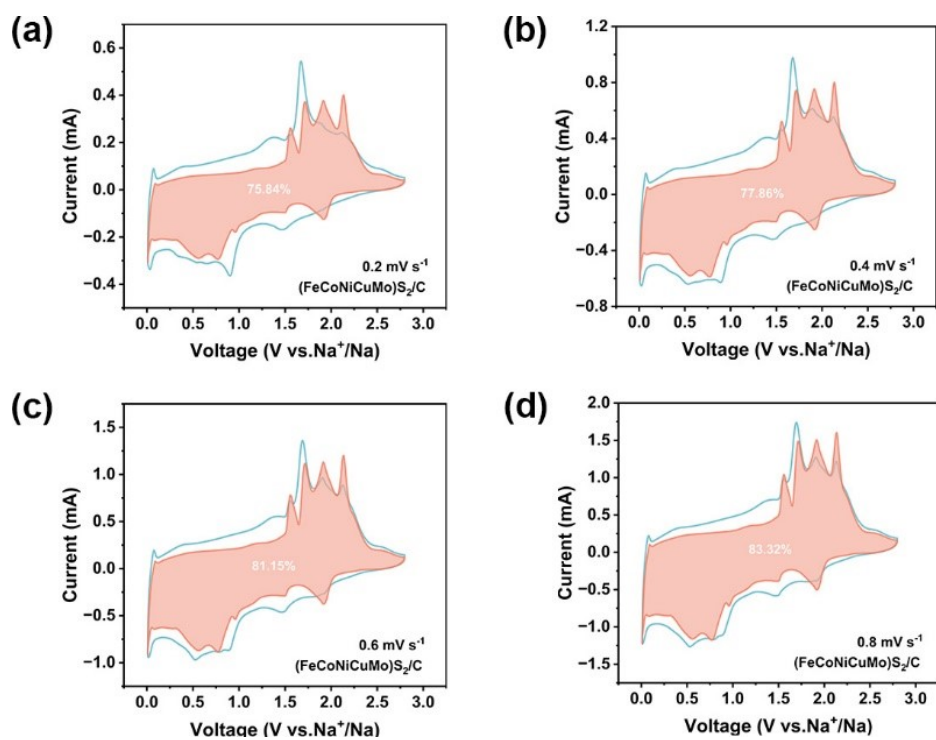

**Figure S8.** Capacitive contribution (shaded area) of the (FeCoNiCuMo)<sub>2</sub>/C electrode at scan rates of: (a) 0.2, (b) 0.4, (c) 0.6, and (d) 0.8 mV s<sup>-1</sup>. Shaded areas represent capacitive contributions, with corresponding percentages labeled on each subfigure.

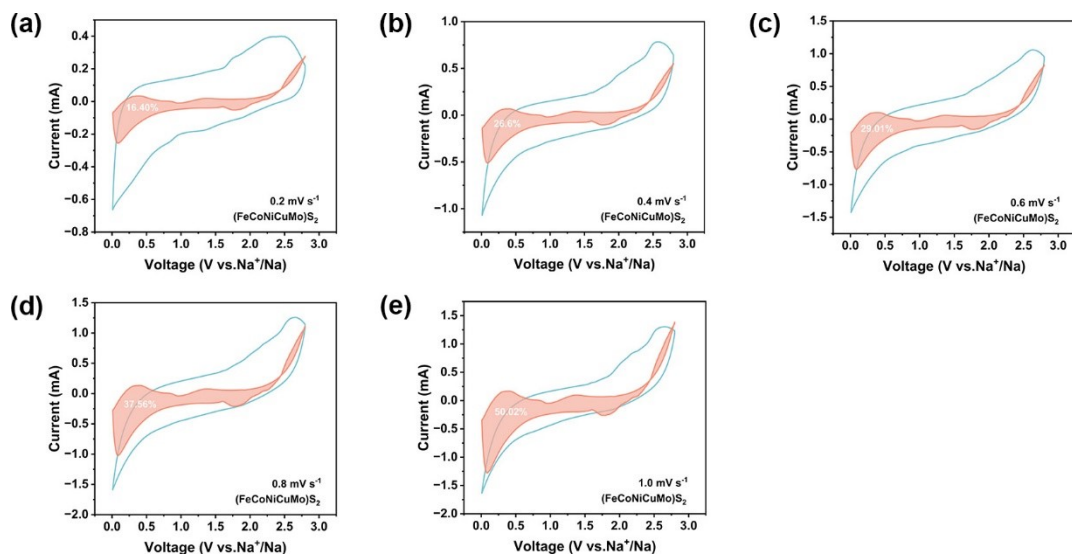

**Figure S9.** Capacitive contribution (shaded area) of the (FeCoNiCuMo)<sub>2</sub> electrode at scan rates

of: (a) 0.2, (b) 0.4, (c) 0.6, and (d) 0.8 mV s<sup>-1</sup> (e) 1.0 mV s<sup>-1</sup>.

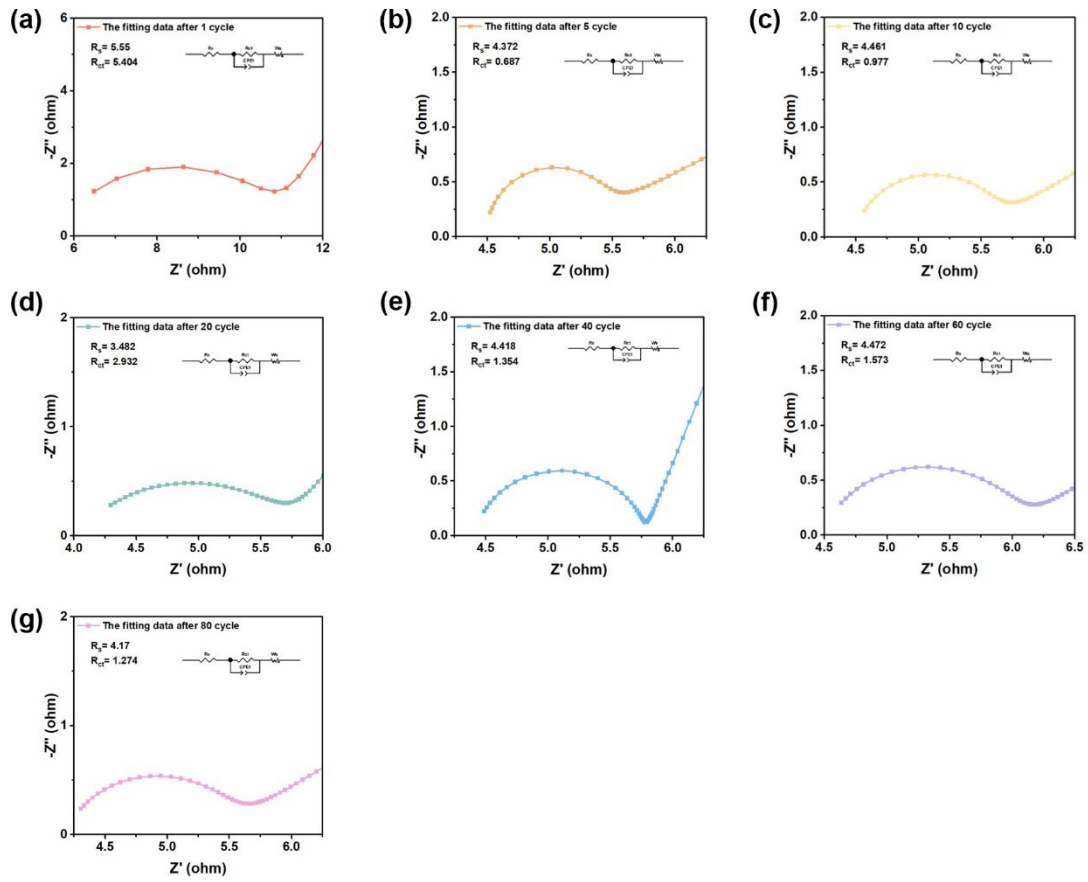

**Figure S10.** Electrochemical impedance spectroscopy (EIS) of the  $(\text{FeCoNiCuMo})\text{S}_2/\text{C}$  electrode and the corresponding equivalent circuit model (inset), showing the evolution of the spectra after different numbers of charge-discharge cycles: (a) 1, (b) 5, (c) 10, (d) 20, (e) 40, (f) 60, and (g) 80 cycles.

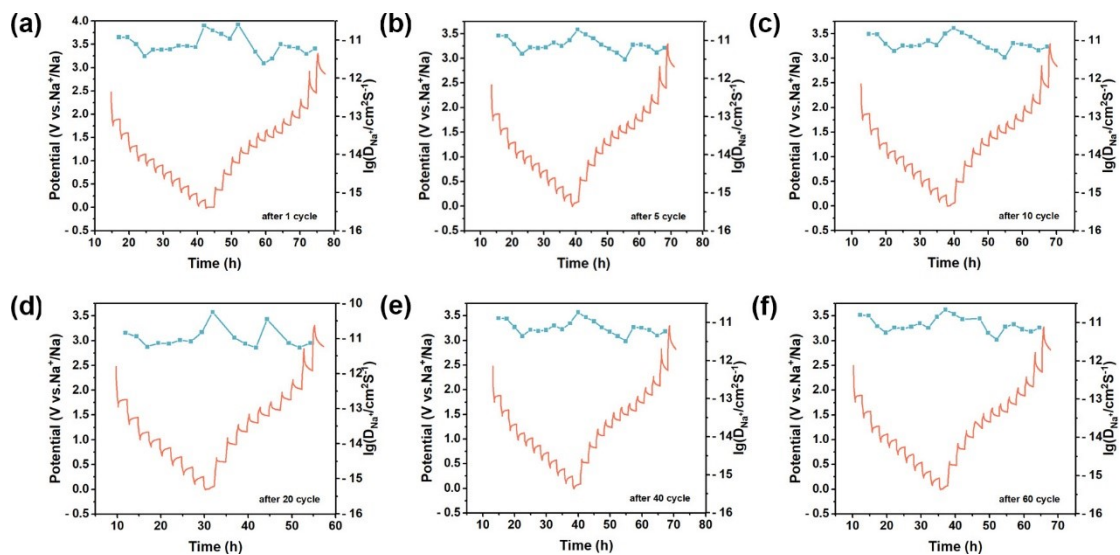

**Figure S11.** Potential response profiles from GITT measurements for the  $(\text{FeCoNiCuMo})\text{S}_2/\text{C}$  electrode, showing the evolution of polarization and hysteresis upon cycling: (a) 1, (b) 5, (c) 10, (d) 20, (e) 40, and (f) 60 cycles.

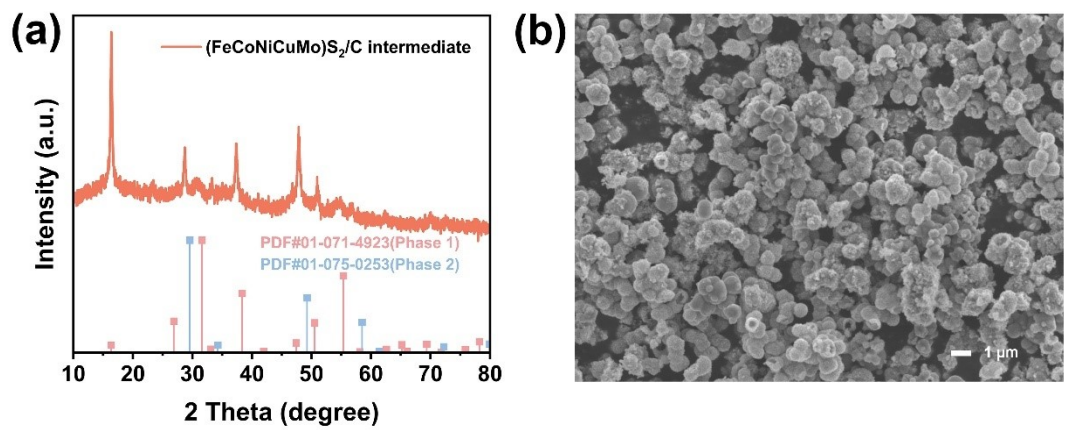

**Figure S12.** (a) XRD pattern and (b) SEM image of the (FeCoNiCuMo)<sub>2</sub>S<sub>2</sub>/C intermediate obtained after the solvothermal reaction.

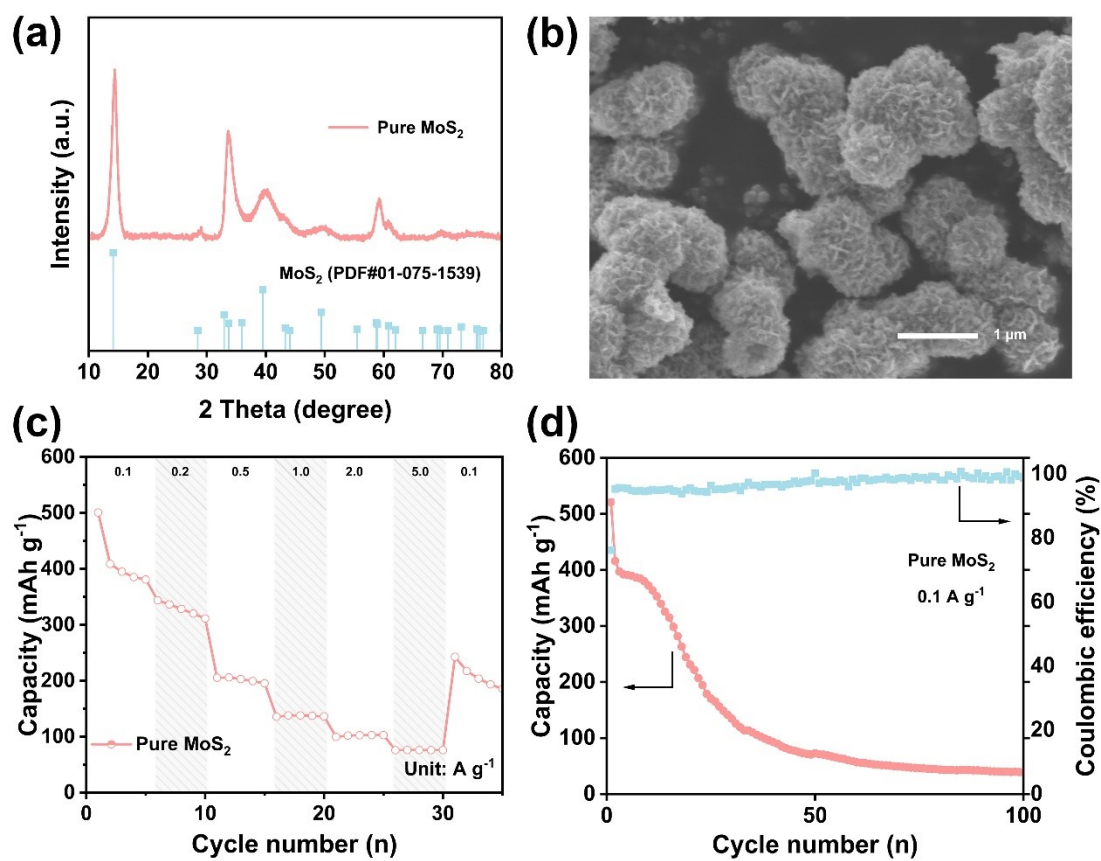

**Figure S13.** (a) XRD pattern and (b) SEM image of the pure MoS<sub>2</sub>. (c) Rate capability and (d) cycling performance at 0.1 A g<sup>-1</sup> of the pure MoS<sub>2</sub> electrode.

**Table S1.** The sodium storage performance of similar metal sulfides materials reported in the literature.

| Samples                                                                                       | Cyclic stability                     |                                 |              | Rate capacity                                                                                                                                     | Ref.      |
|-----------------------------------------------------------------------------------------------|--------------------------------------|---------------------------------|--------------|---------------------------------------------------------------------------------------------------------------------------------------------------|-----------|
|                                                                                               | Current density (A g <sup>-1</sup> ) | Capacity (mAh g <sup>-1</sup> ) | Cycle number |                                                                                                                                                   |           |
| (FeCoNiCuMo)<br>S <sub>2</sub> /C                                                             | 0.1                                  | 757                             | 80           | 711,672,627,577,527, 437 and 345 mAh g <sup>-1</sup> at 0.1, 0.2, 0.5, 1.0, 2.0,5.0 and 10.0 A g <sup>-1</sup> , respectively                     | This Work |
|                                                                                               | 1                                    | 468                             | 600          |                                                                                                                                                   |           |
| SnSbMnBiTe                                                                                    | 0.1                                  | 381.7                           | 80           | 437.4, 416.5, 386.2, 381.0 and 351.0 mAh g <sup>-1</sup> , at 0.2, 0.5,1.0, 2.0 and 5.0 A g <sup>-1</sup> , respectively                          | [1]       |
| SnCo@C                                                                                        | 0.1                                  | 276.2                           | 120          | -                                                                                                                                                 | [2]       |
| Bi <sub>80</sub> Sn <sub>50</sub> Sb <sub>50</sub> Cu <sub>80</sub><br>Al <sub>80</sub> @PCFs | 5                                    | 235                             | 500          | 202, 190,185 and 180 mAh g <sup>-1</sup> at 10, 15, 20and 25.0 A g <sup>-1</sup> , respectively                                                   | [3]       |
| NiS <sub>2</sub> /NG                                                                          | 0.1                                  | 676.0                           | 100          | 615.1, 594.6, 569.7, 555.8, and 545.0 mAh g <sup>-1</sup> at 0.1, 0.2, 0.5, 1, 1.5, and 2.0 A g <sup>-1</sup> , respectively                      | [4]       |
| WZSC (WS <sub>2-x</sub> /<br>ZnS@C)                                                           | 1                                    | 329.1                           | 500          | 468.2, 411.1, 352.5, 296.4, 251.4, 206.4, 180.7, and 181.9 mAh g <sup>-1</sup> at 0.1, 0.2, 0.5, 1, 2, 5, 10, 20 A g <sup>-1</sup> , respectively | [5]       |

|                                      |     |       |     |                                                                                                                                                           |      |
|--------------------------------------|-----|-------|-----|-----------------------------------------------------------------------------------------------------------------------------------------------------------|------|
| CC-ZnS/CNT                           | 0.1 | 730   | 200 | 634, 603, 522, 410, 317, and 295 mAh g <sup>-1</sup> at 0.1, 0.2, 0.5, 1, 1.5, and 2 A g <sup>-1</sup> , respectively                                     | [6]  |
| M-FeS@C+CNT.                         | 1   | 366   | 860 | 505, 486, 471, 464, 454, 438, 418, 403, 380, and 332 mAh g <sup>-1</sup> at 0.05, 0.1, 0.2, 0.3, 0.5, 1, 2, 3, 5, and 10 A g <sup>-1</sup> , respectively | [7]  |
| NiS <sub>2</sub> @C@C                | 0.1 | 580.8 | 100 | 694, 671, 670, 631, 555, and 448 mAh g <sup>-1</sup> at 0.05, 0.1, 0.2, 0.4, 0.8, and 1.6 A g <sup>-1</sup> , respectively                                | [8]  |
| Co <sub>3</sub> S <sub>4</sub> @PANI | 0.2 | 252.5 | 100 | 295.5, 218.6, 189.3, 184.1 mAh g <sup>-1</sup> at 200, 1000, 2000, 4000 mA g <sup>-1</sup> , respectively                                                 | [9]  |
| CuS-RGO-2                            | 0.1 | 392.9 | 50  | 509.1, 383.3, and 370.2 mAh g <sup>-1</sup> at 100, 250, and 500 mA g <sup>-1</sup> , respectively                                                        | [10] |

## References

- [1] J. Zhao, J. Yue, S. Gao, T. Li, Synergistic Multi-Element Strategy Enables SnSbMnBiTe High-Entropy Alloy Anode for Stable and Fast Sodium Storage, *ACS Sustainable Chemistry & Engineering* 13(28) (2025) 11143-11152. <https://doi.org/10.1021/acssuschemeng.5c04513>.
- [2] B. Huang, J. Yang, Y. Li, S. Xiao, Q. Chen, Carbon encapsulated Sn-Co alloy: A stabilized tin-based material for sodium storage, *Materials Letters* 210 (2018) 321-324. <https://doi.org/10.1016/j.matlet.2017.09.055>.
- [3] B. Liu, M. Li, Y. Wu, R. Ren, Q. Ge, L. Fan, P. Qin, J. Qian, X. Ding, High-entropy BiSnSbCuAl nanoalloys conformed in carbon fibers as fast-charging and high-capacity anode material for sodium-ion batteries, *Journal of Power Sources* 652 (2025) 237600. <https://doi.org/10.1016/j.jpowsour.2025.237600>.
- [4] S. Luo, J. Shang, Y.n. Xu, H. Cheng, L. Zhang, Y. Tang, Stabilizing NiS<sub>2</sub> on Conductive Component via Electrostatic Self-assembly and Covalent Bond Strategy for Promoting Sodium Storage, *Advanced Functional Materials* 34(39) (2024) 2403166. <https://doi.org/10.1002/adfm.202403166>.
- [5] Y. Li, J. Qian, M. Zhang, S. Wang, Z. Wang, M. Li, Y. Bai, Q. An, H. Xu, F. Wu, L. Mai, C. Wu, Co-Construction of Sulfur Vacancies and Heterojunctions in Tungsten Disulfide to Induce Fast Electronic/Ionic Diffusion Kinetics for Sodium-Ion Batteries, *Advanced Materials* 32(47) (2020) 2005802. <https://doi.org/10.1002/adma.202005802>.
- [6] T. Hou, B. Liu, X. Sun, A. Fan, Z. Xu, S. Cai, C. Zheng, G. Yu, A. Tricoli, Covalent Coupling-Stabilized Transition-Metal Sulfide/Carbon Nanotube Composites for Lithium/Sodium-Ion Batteries, *ACS Nano* 15(4) (2021) 6735-6746. <https://doi.org/10.1021/acsnano.0c10121>.
- [7] H. Lim, S. Kim, J. Hoon Kim, H. Chan Lee, G. Lee, J. Hwan Park, J. Tark Han, K. Cho, Carbon shell-coated mackinawite FeS platelets as anode materials for high-performance sodium-ion batteries, *Chemical Engineering Journal* 458 (2023) 141354. <https://doi.org/10.1016/j.cej.2023.141354>.
- [8] G. Zhao, Y. Zhang, L. Yang, Y. Jiang, Y. Zhang, W. Hong, Y. Tian, H. Zhao, J. Hu, L. Zhou, H. Hou, X. Ji, L. Mai, Nickel Chelate Derived NiS<sub>2</sub> Decorated with Bifunctional Carbon: An Efficient Strategy to Promote Sodium Storage Performance, *Advanced Functional Materials* 28(41) (2018) 1803690. <https://doi.org/10.1002/adfm.201803690>.
- [9] Q. Zhou, I. Liu, Z. Huang, L. Yi, G. Cao, Co<sub>3</sub>S<sub>4</sub>@Polyaniline Nanotubes as High-Performance Anode Materials for Sodium Ion Batteries, *J. Mater. Chem. A* 4 (2016). <https://doi.org/10.1039/C6TA01497F>.
- [10] J. Li, D. Yan, T. Lu, W. Qin, Y. Yao, L. Pan, Significantly Improved Sodium-Ion Storage Performance of CuS Nanosheets Anchored into Reduced Graphene Oxide with Ether-Based Electrolyte, *ACS Applied Materials & Interfaces* 9(3) (2017) 2309-2316. <https://doi.org/10.1021/acsami.6b12529>.
